# Supplementary material
Source: publisher figshare collection journal article supplement (https://acs.figshare.com/ndownloader/files/18001964)
Supplement: Supplementary file 1 [file 18001964]

## Sheet: Cmpd Characterization Checklist
															Corresponding Author					Dustin J. Maly (djmaly@uw.edu)
															Title	Development of a chemical toolset for studying the paralog-specific function of IRE1
COMPOUND CHARACTERIZATION CHECKLIST
															asfsad
COMPOUND				IDENTITY												PURITY					COMPUTATIONAL DATA in SI*			AUTHOR REMARKS
Compound, structure, or table-entry number		New	Known	Weight and percentage yield	Physical state / mp range if cryst. solid	IR	UV-Vis	1H NMR	13C NMR	MS	MS Accurate mass (HRMS)	Optical rotation/ORD/CD	Enantiomeric/Diastereomeric ratio	X-ray [ORTEP and CIF in SI*]	<>	Copy of 1H/13C NMR spectrum in SI*	Copy of chromatogram in SI*	Quant. GC, HPLC, electrophoresis	Elemental analysis	<>	Cartesian coordinates or Z-matrix	# of imaginary frequencies	Total energy	(* SI = Supporting Information)
tert-butyl (1s,4s)-4-(4-(2-fluoropyridin-3-yl)pyrimidin-2-ylamino) cyclohexylcarbamate			X	X				X		X														Harrington, P. E., et al., (2015) ACS Med. Chem. Lett. 6, 68−72
(S)​-​tert-​Butyl 3-​((4-​(2-​fluoropyridin-​3-​yl)​pyrimidin-​2-​yl)​amino)​-​2-​aza-​spiro[3.3]​heptane-​2-​carboxylate		X		X				X		X
tert-butyl (1s,4s)-4-(4-(2-(4-aminonaphthalen-1-yloxy)pyridin-3-yl)pyrimidin-2-ylamino)cyclohexylcarbamate		X		X				X		X
tert-butyl (1s,4s)-4-(4-(2-(5-aminonaphthalen-1-yloxy)pyridin-3-yl)pyrimidin-2-ylamino)cyclohexylcarbamate		X		X				X		X
(3R)-tert-butyl 3-(4-(2-(4-aminonaphthalen-1-yloxy)pyridin-3-yl)pyrimidin-2-ylamino)-​2-​aza-​spiro[3.3]​heptane-​2-carboxylate		X		X				X
tert-butyl (1s,4s)-4-(4-(2-(4-amino-3-fluorophenoxy)pyridin-3-yl)pyrimidin-2-ylamino)cyclohexylcarbamate		X		X				X		X
(3R)-tert-butyl 3-(4-(2-(4-amino-3-fluorophenoxy)pyridin-3-yl)pyrimidin-2-ylamino)piperidine-1-carboxylate		X		X				X		X
tert-butyl (1s,4s)-4-(4-(2-(4-amino-3-chlorophenoxy)pyridin-3-yl)pyrimidin-2-ylamino)cyclohexylcarbamate		X		X				X
(3R)-tert-butyl 3-(4-(2-(4-amino-3-chlorophenoxy)pyridin-3-yl)pyrimidin-2-ylamino)piperidine-1-carboxylate		X		X				X		X
tert-butyl (1s,4s)-4-(4-(2-(4-amino-2-fluorophenoxy)pyridin-3-yl)pyrimidin-2-ylamino)cyclohexylcarbamate		X		X				X		X
(3R)-tert-butyl 3-(4-(2-(4-amino-2-fluorophenoxy)pyridin-3-yl)pyrimidin-2-ylamino)piperidine-1-carboxylate		X		X				X		X
tert-butyl (1s,4s)-4-(4-(2-(4-amino-5-chloro-2-fluorophenoxy)pyridin-3-yl)pyrimidin-2-ylamino)cyclohexylcarbamate		X		X				X		X
(3R)-tert-butyl 3-(4-(2-(4-amino-5-chloro-2-fluorophenoxy)pyridin-3-yl)pyrimidin-2-ylamino)piperidine-1-carboxylate		X		X				X		X
tert-butyl (1s,4s)-4-(4-(2-(4-aminonaphthalen-1-yloxy)pyridin-3-yl)pyrimidin-2-ylamino)cyclohexylcarbamate		X		X				X
tert-butyl (1s,4s)-4-(4-(2-(4-amino-2,3-difluorophenoxy)pyridin-3-yl)pyrimidin-2-ylamino)cyclohexylcarbamate		X		X				X
1			X																					Harrington, P. E., et al., (2015) ACS Med. Chem. Lett. 6, 68−72
2			X																					Harrington, P. E., et al., (2015) ACS Med. Chem. Lett. 6, 68−72
3			X																					Harrington, P. E., et al., (2015) ACS Med. Chem. Lett. 6, 68−72
4		X						X		X							X	X
5		X						X		X							X	X
6		X						X		X							X	X
7		X						X		X							X	X
8		X						X		X							X	X
9		X						X		X							X	X
10		X						X		X							X	X
11		X						X		X							X	X
12		X						X		X							X	X
13		X						X		X							X	X
14		X						X		X							X	X
15		X						X		X							X	X
16		X						X		X							X	X
17		X						X		X							X	X
18		X						X		X							X	X
